# Supplementary material
Source: PubMed Central journal article supplement (PMC7689350)
Supplement: mmc1.pdf [file mmc1.pdf]

## Supplemental Information

### Low-Avidity CD4<sup>+</sup> T Cell Responses to SARS-CoV-2 in Unexposed Individuals and Humans with Severe COVID-19

Petra Bacher, Elisa Rosati, Daniela Esser, Gabriela Rios Martini, Carina Saggau, Esther Schiminsky, Justina Dargvainiene, Ina Schröder, Imke Wieters, Yascha Khodamoradi, Fabian Eberhardt, Maria J.G.T. Vehreschild, Holger Neb, Michael Sonntagbauer, Claudio Conrad, Florian Tran, Philip Rosenstiel, Robert Markewitz, Klaus-Peter Wandinger, Max Augustin, Jan Rybniker, Matthias Kochanek, Frank Leypoldt, Oliver A. Cornely, Philipp Koehler, Andre Franke, and Alexander Scheffold

# Supplemental Figure 1

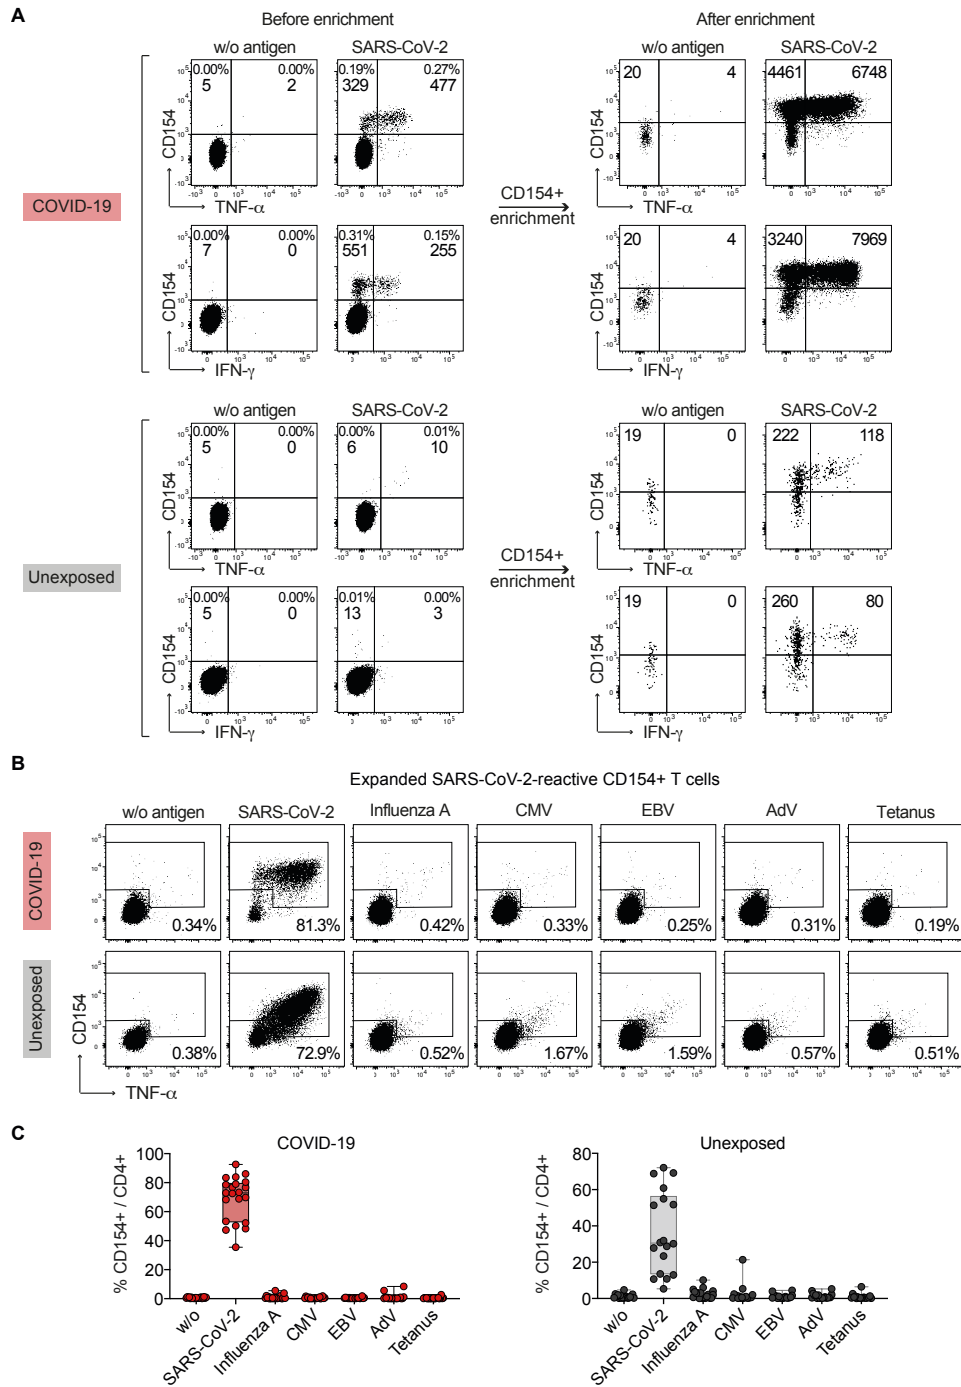

**Figure S1. Detection of SARS-CoV-2 reactive CD4<sup>+</sup> T cells by ARTE, Related to Figure 1.**

(A) Ex vivo detection of SARS-CoV-2 pool-reactive CD4<sup>+</sup> T cells by ARTE. Percentage within CD4<sup>+</sup> T cells and absolute cell counts before and after magnetic CD154<sup>+</sup> enrichment from 1×10<sup>7</sup> PBMCs of a COVID-19 patient and unexposed donor are indicated.

(B and C) Re-stimulation of FACS purified, expanded SARS-CoV-2 pool-reactive CD154<sup>+</sup> T cells with the SARS-CoV-2 pool or control antigens. (B) Percentage of CD154<sup>+</sup>TNF-α<sup>+</sup> cells within CD4<sup>+</sup> is indicated. (C) Statistical summary, each symbol represents one donor. Box-and-whisker plots display quartiles and range. Unexposed donors (n=18), COVID-19 patients (n=21).

## Supplemental Figure 2

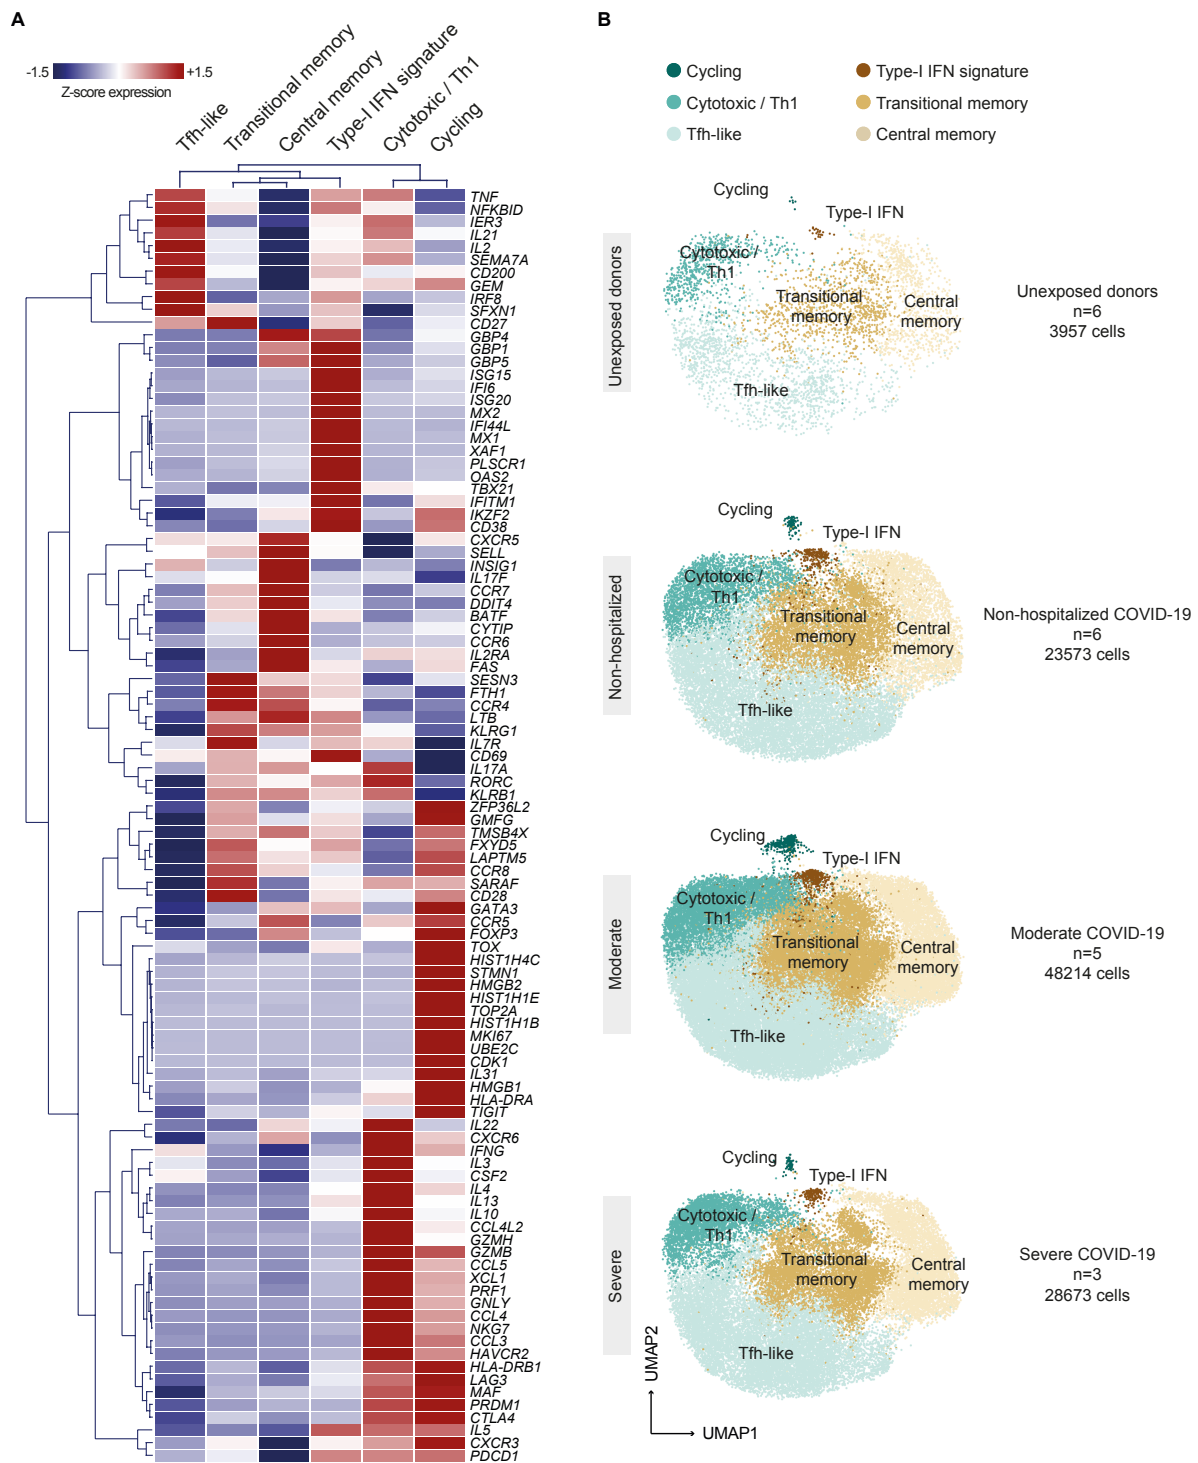

**Figure S2. Gene expression of SARS-CoV-2 reactive CD4<sup>+</sup> T cell clusters, Related to Figure 2.**

Single cell transcriptomes of FACS purified ex vivo isolated CD154<sup>+</sup> memory T cells following stimulation with pooled SARS-CoV-2 spike, membrane and nucleocapsid proteins from unexposed donors (n=6) and COVID-19 patients (n=14).

(A) Heatmap depicting Z-score normalized expression levels of the top 10 differential expressed marker genes of each cluster and other selected genes.

(B) UMAP visualization of the subset composition of SARS-CoV-2 reactive CD4<sup>+</sup> T cells colored by functional gene expression clusters for unexposed donors (n=6) and non-hospitalized (n=6), moderate (WHO 4-5; n=5) and severe (WHO 6-7; n=3) COVID-19 patients.

### Supplemental Figure 3

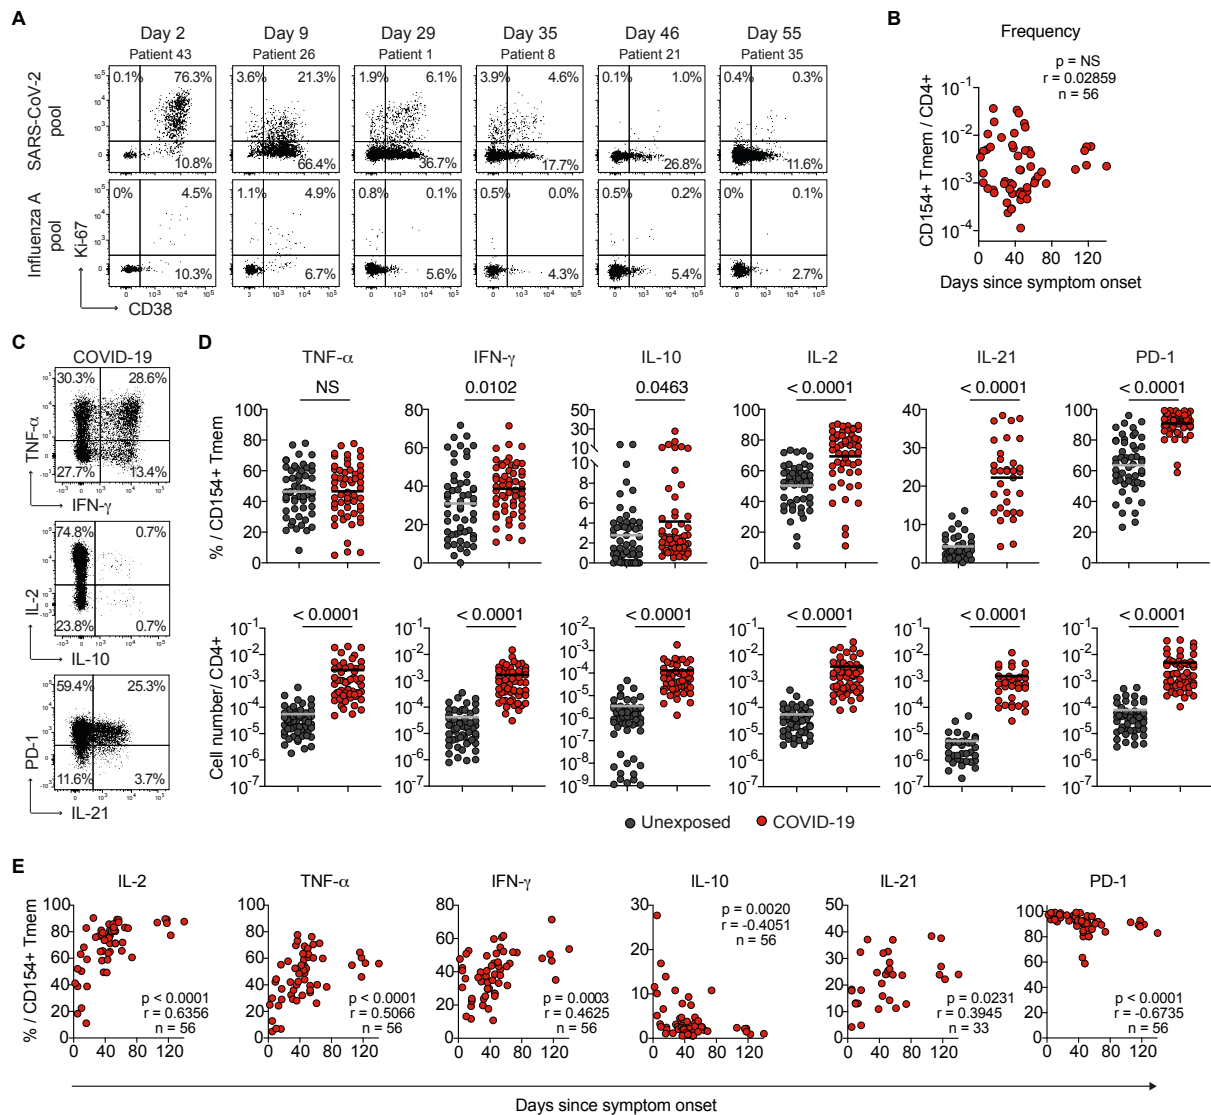

**Figure S3. Inflammatory SARS-CoV-2-specific CD4+ T cell responses in COVID-19 patients, Related to Figure 2.**

(A) Ex vivo Ki-67 and CD38 staining of SARS-CoV-2 pool- or Influenza A-reactive CD154+ Tmem from COVID-19 patients at different time points after disease onset. Percentage of Ki-67+ and/ or CD38+ cells within CD154+ Tmem are indicated.

(B) Spearman correlation of the frequencies of SARS-CoV-2 pool-reactive CD154+ Tmem and days since disease onset in COVID-19 patients (n=56).

(C) Ex vivo cytokine and phenotype staining of SARS-CoV-2 pool-reactive CD154+ Tmem from a COVID-19 patient. Percentage of marker positive cells within CD154+ Tmem are indicated.

(D) Ex vivo cytokine production and phenotype of SARS-CoV-2 pool-reactive cells. Upper row: relative frequencies within CD154+ Tmem and lower row: absolute frequencies within total CD4+ T cells. Unexposed donors (n=55; IL-21 n=36), COVID-19 patients (n=56; IL-21 n=33).

(E) Spearman correlation of cytokine and phenotypic marker expression of SARS-CoV-2 pool-reactive CD154+ Tmem and days since disease onset.

Each symbol in (B, D, E) represents one donor, horizontal lines indicate (D) mean. Statistical differences: (D) Two-tailed Mann-Whitney test.

## Supplemental Figure 4

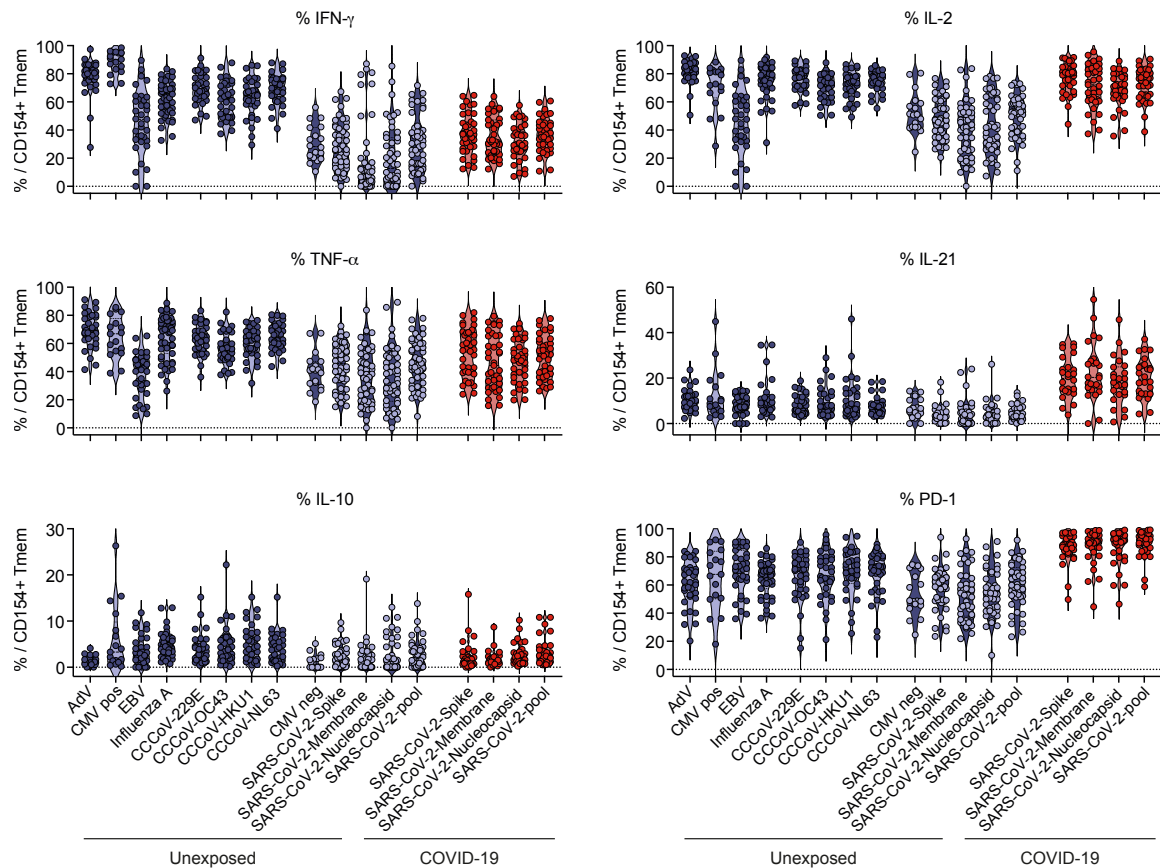

**Figure S4. Pattern of SARS-CoV-2 reactive CD4+ T cells compared to other anti-viral responses, Related to Figure 2.**

*Ex vivo* cytokine production and phenotype of SARS-CoV-2-reactive cells of re-convalescent COVID-19 patients in comparison to other anti-viral responses in SARS-CoV-2 unexposed donors (n=26-50). Each symbol represents one donor.

## Supplemental Figure 5

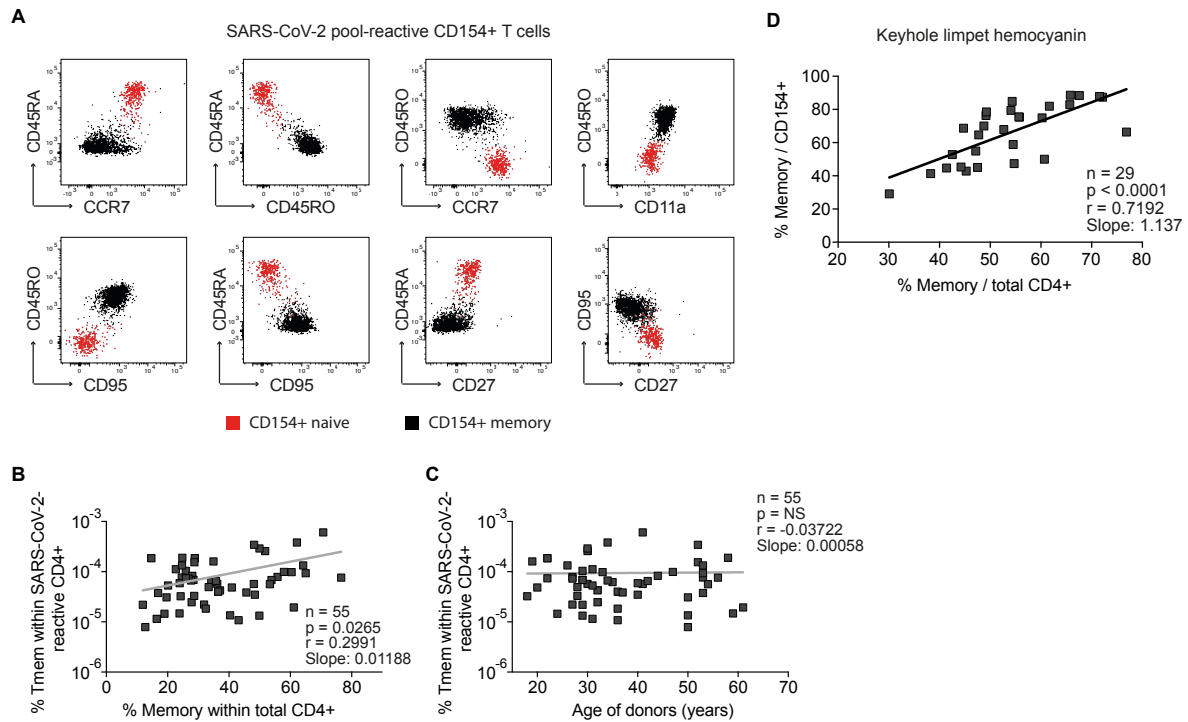

**Figure S5. Proportion of neoantigen-specific memory T cells correlates with the proportion of memory cells in the total CD4+ pool, Related to Figure 3.**

(A) Representative dot plot examples showing expression of phenotypic markers on SARS-CoV2-reactive CD154+ T cells from an unexposed donor. Naive antigen-specific T cells colored in red were defined as CD154+CD45RA+CCR7+ and are shown as overlay with the CD154+CD45RA-memory population (black).

(B) Spearman correlation between the frequencies of SARS-CoV-2 pool-reactive T cells in unexposed donors and the proportion of memory cells within the total CD4+ population.

(C) Spearman correlation between the frequencies of SARS-CoV-2 pool-reactive T cells in unexposed donors and the age of the donors.

(D) Pearson correlation between the proportion of memory cells within the antigen-specific T cells (y-axis) and the proportion of memory cells within the total CD4+ population is shown for the neoantigen keyhole limpet hemocyanin (KLH).

Each symbol in (B-D) represents one donor.

## Supplemental Figure 6

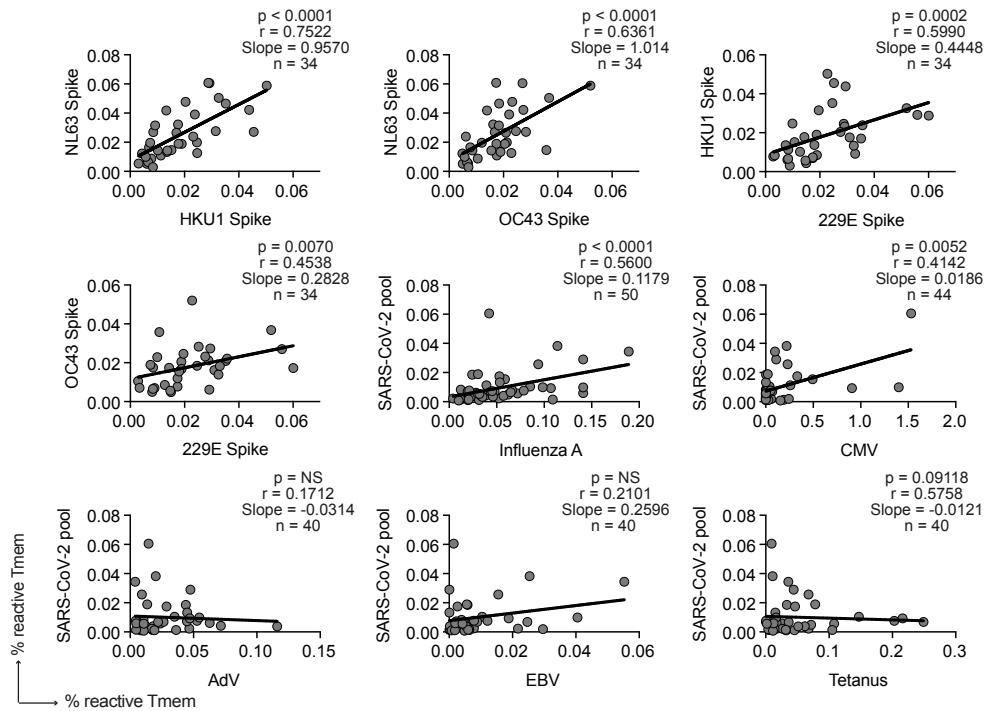

**Figure S6. Correlations of SARS-CoV-2-reactive T cells of unexposed donors with the response against other common viruses, Related to Figure 5.**

Spearman correlation between CD154+ Tmem frequencies reactive against different CCCoVs or SARS-CoV-2 and Influenza A (H1N1), Cytomegalovirus (CMV), Epstein-Barr Virus (EBV), Adenovirus (AdV) or tetanus in unexposed donors. Each symbol represents one donor.

## Supplemental Figure 7

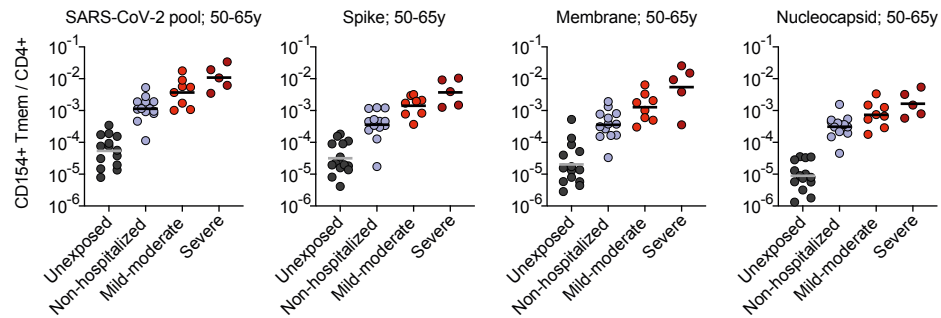

**Figure S7. SARS-CoV-2-reactive T cell in age-selected donors,** Related to Figure 6.

Frequencies of Tmem reactive against the indicated SARS-CoV-2 proteins in donors with an age range of 50-65. The COVID-19 severity level was assessed based on WHO criteria, whereby WHO groups 3-5 (moderate) and 6-7 (severe) were combined to increase statistical power (see table S1). Unexposed donors n=14, Non-hospitalized n=13 (WHO 1-2), moderate n=8 (WHO 3 n=1, WHO 4 n=4, WHO 5 n=3), severe n=5 (WHO 6 n=2, WHO 7 n=3). Each symbol in represents one donor, horizontal lines indicate mean.



**Table S1. Cohort characteristics, Related to STAR Methods and Figures 1, 3 and 6.**

|                                              | <b>COVID-19 (n=56)</b> | <b>Unexposed (n=64)</b> |
|----------------------------------------------|------------------------|-------------------------|
| <b>Age mean</b>                              | 51 years (range 22-88) | 37 years (range 18-61)  |
| <b>Gender</b>                                |                        |                         |
| Male                                         | 50% (28/56)            | 34% (22/64)             |
| Female                                       | 50% (28/56)            | 66% (42/64)             |
| <b>Disease Severity<sup>a</sup></b>          |                        |                         |
| Non-hospitalized (WHO 1-2)                   | 57% (32/56)            | NA                      |
| Mild-moderate (WHO 3-5)                      | 23% (13/56)            | NA                      |
| Severe (WHO 6-7)                             | 20% (11/56)            | NA                      |
| <b>SARS-CoV PCR positive</b>                 |                        |                         |
| Non-hospitalized (WHO 1-2)                   | 84% (27/32)            | NA                      |
| Mild-moderate (WHO 3-5)                      | 100% (13/13)           | NA                      |
| Severe (WHO 6-7)                             | 100% (11/11)           | NA                      |
| Total                                        | 91% (51/56)            | NA                      |
| <b>Antibody test positive<sup>b, c</sup></b> |                        |                         |
| Non-hospitalized (WHO 1-2)                   | 100% (32/32)           | NA                      |
| Mild-moderate (WHO 3-5)                      | 77% (10/13)            | NA                      |
| Severe (WHO 6-7)                             | 100% (11/11)           | NA                      |
| Total                                        | 95% (53/56)            | 0% (0/64)               |

<sup>a</sup>WHO criteria

<sup>b</sup>Elecsys Anti-SARS-CoV-2, Roche Diagnostics GmbH

<sup>c</sup>Anti-SARS-CoV-2 ELISA, Euroimmun

NA=not applicable

**Table S2. Patients characteristics, Related to STAR Methods and Figures 1, 3 and 6.**

| ID  | Age | Gender | Classification   | WHO class | Days since symptom onset | Status       | SARS-CoV-2 RNA Test | SARS-CoV-2 antibodies | SARS-CoV-2 antibodies <sup>a</sup> |
|-----|-----|--------|------------------|-----------|--------------------------|--------------|---------------------|-----------------------|------------------------------------|
| 1   | 33  | male   | Non-hospitalized | WHO 1/2   | 29                       | convalescent | positive            | positive              | 53.48                              |
| 2   | 33  | female | Non-hospitalized | WHO 1/2   | 31                       | convalescent | positive            | positive              | 7.06                               |
| 8   | 47  | female | Non-hospitalized | WHO 1/2   | 35                       | convalescent | positive            | positive              | 77.66                              |
| 9   | 51  | male   | Non-hospitalized | WHO 1/2   | 46                       | convalescent | positive            | positive              | 39.93                              |
| 10  | 34  | male   | Non-hospitalized | WHO 1/2   | 32                       | convalescent | not done            | positive              | 3.14                               |
| 12  | 37  | female | Non-hospitalized | WHO 1/2   | 37                       | convalescent | positive            | positive              | 72.28                              |
| 13  | 62  | female | Non-hospitalized | WHO 1/2   | 37                       | convalescent | positive            | positive              | 35.77                              |
| 14  | 84  | female | Non-hospitalized | WHO 1/2   | 34                       | convalescent | positive            | positive              | 4.11                               |
| 15  | 34  | male   | Non-hospitalized | WHO 1/2   | 28                       | convalescent | negative            | positive              | 12.24                              |
| 16  | 27  | female | Non-hospitalized | WHO 1/2   | 36                       | convalescent | negative            | positive              | 1.27                               |
| 17  | 27  | male   | Non-hospitalized | WHO 1/2   | 36                       | convalescent | positive            | positive              | 21.62                              |
| 21  | 22  | male   | Non-hospitalized | WHO 1/2   | 46                       | convalescent | positive            | positive              | 23.99                              |
| 27  | 59  | female | Non-hospitalized | WHO 1/2   | 62                       | convalescent | not done            | positive              | 10.42                              |
| 28  | 27  | female | Non-hospitalized | WHO 1/2   | 46                       | convalescent | negative            | positive              | 39.89                              |
| 35  | 40  | male   | Non-hospitalized | WHO 1/2   | 55                       | convalescent | positive            | positive              | 72.44                              |
| 36  | 59  | male   | Non-hospitalized | WHO 1/2   | 46                       | convalescent | positive            | positive              | 77.5                               |
| 37  | 28  | female | Non-hospitalized | WHO 1/2   | 45                       | convalescent | positive            | positive              | 3.26                               |
| 38  | 46  | male   | Non-hospitalized | WHO 1/2   | 65                       | convalescent | positive            | positive              | 25.7                               |
| 61  | 29  | female | Non-hospitalized | WHO 1/2   | 53                       | convalescent | positive            | positive              | 1.92                               |
| 63  | 27  | female | Non-hospitalized | WHO 1/2   | 61                       | convalescent | positive            | positive              | 63.71                              |
| 81  | 56  | male   | Non-hospitalized | WHO 1/2   | 53                       | convalescent | positive            | positive              | 33.9                               |
| 82  | 33  | female | Non-hospitalized | WHO 1/2   | 48                       | convalescent | positive            | positive              | 4.05                               |
| 83  | 47  | female | Non-hospitalized | WHO 1/2   | 51                       | convalescent | positive            | positive              | 100.5                              |
| 84  | 52  | male   | Non-hospitalized | WHO 1/2   | 53                       | convalescent | positive            | positive              | 38.42                              |
| 86  | 52  | female | Non-hospitalized | WHO 1/2   | 45                       | convalescent | positive            | positive              | 96.99                              |
| 89  | 29  | male   | Non-hospitalized | WHO 1/2   | 74                       | convalescent | positive            | positive              | 14.3                               |
| 126 | 61  | male   | Non-hospitalized | WHO 1/2   | 106                      | convalescent | positive            | positive              | 7.61 <sup>b</sup>                  |
| 142 | 58  | female | Non-hospitalized | WHO 1/2   | 118                      | convalescent | positive            | positive              | 4.03 <sup>b</sup>                  |
| 143 | 61  | female | Non-hospitalized | WHO 1/2   | 116                      | convalescent | positive            | positive              | 5.24 <sup>b</sup>                  |
| 144 | 57  | female | Non-hospitalized | WHO 1/2   | 118                      | convalescent | positive            | positive              | 3.18 <sup>b</sup>                  |
| 151 | 51  | female | Non-hospitalized | WHO 1/2   | 57                       | convalescent | positive            | positive              | 1.5 <sup>b</sup>                   |
| 154 | 61  | female | Non-hospitalized | WHO 1/2   | 57                       | convalescent | positive            | positive              | 6.95 <sup>b</sup>                  |
| 85  | 56  | male   | mild-moderate    | WHO 3     | 43                       | convalescent | positive            | positive              | 11.02                              |
| 80  | 38  | male   | mild-moderate    | WHO 3     | 5                        | active       | positive            | negative              | 0.06                               |
| 26  | 68  | female | mild-moderate    | WHO 4     | 9                        | convalescent | positive            | positive              | 10.45                              |
| 49  | 65  | male   | mild-moderate    | WHO 4     | 25                       | convalescent | positive            | positive              | 54.46                              |
| 65  | 57  | female | mild-moderate    | WHO 4     | 13                       | active       | positive            | negative              | 0.883                              |
| 77  | 54  | female | mild-moderate    | WHO 4     | 50                       | convalescent | positive            | positive              | 81.96                              |
| 22  | 88  | female | mild-moderate    | WHO 4     | 16                       | active       | positive            | negative              | 0.122                              |
| 79  | 33  | female | mild-moderate    | WHO 4     | 5                        | active       | positive            | negative              | 0.159                              |
| 129 | 58  | male   | mild-moderate    | WHO 4     | 140                      | convalescent | positive            | positive              | 6.62 <sup>b</sup>                  |
| 78  | 53  | male   | mild-moderate    | WHO 5     | 69                       | convalescent | positive            | positive              | 3.85                               |
| 110 | 69  | male   | mild-moderate    | WHO 5     | 44                       | convalescent | positive            | positive              | 20.67                              |
| 111 | 60  | male   | mild-moderate    | WHO 5     | 5                        | active       | positive            | positive              | 11.4                               |
| 24  | 51  | female | mild-moderate    | WHO 5     | 38                       | active       | positive            | positive              | 18.84                              |
| 66  | 70  | male   | severe           | WHO 6     | 17                       | convalescent | positive            | positive              | 4.54                               |
| 76  | 76  | male   | severe           | WHO 6     | 51                       | convalescent | positive            | positive              | 75.97                              |
| 43  | 50  | female | severe           | WHO 6     | 2                        | active       | positive            | positive              | 14.05                              |
| 46  | 68  | male   | severe           | WHO 6     | 39                       | convalescent | positive            | positive              | 5.07                               |
| 68  | 63  | male   | severe           | WHO 6     | 10                       | active       | positive            | positive              | 16.15                              |
| 45  | 52  | male   | severe           | WHO 7     | 17                       | convalescent | positive            | positive              | 45.68                              |
| 88  | 62  | female | severe           | WHO 7     | 42                       | convalescent | positive            | positive              | 63.12                              |
| 115 | 67  | female | severe           | WHO 7     | 123                      | convalescent | positive            | positive              | 19.7                               |
| 44  | 78  | male   | severe           | WHO 7     | 16                       | convalescent | positive            | positive              | 11.36                              |
| 47  | 61  | male   | severe           | WHO 7     | 37                       | convalescent | positive            | positive              | 62.06                              |
| 48  | 68  | male   | severe           | WHO 7     | 10                       | active       | positive            | positive              | 9.99                               |

<sup>a</sup>Elecsys Anti-SARS-CoV-2 IgG/IgM. Roche Diagnostics GmbH; positive >1.0

<sup>b</sup>Anti-SARS-CoV-2 IgG ELISA, Euroimmun, Lübeck, Germany; positive >1.0
